# Supplementary material
Source: Springer Nature journal article supplement (https://www.springermedizin.de/resource/supplementary/12982_2007_53_MOESM13_ESM.pdf/9604370)
Supplement: MOESM13 [file 9604370]

Italian / Italiano

Editorial

**Libero accesso alle pubblicazioni per il mondo non anglofono: come abbattere le barriere linguistiche**

Autore: Isaac Chun-Hai FUNG

Abstract

Sull'onda del recente successo del Movimento "Open Access" (*ndt.* "Accesso libero"), questo editoriale affronta il problema delle barriere linguistiche nella comunicazione scientifica. Alle riviste in lingua inglese, vengono suggerite 4 possibilità per il superamento di suddette barriere: 1) fornire la possibilità agli autori di inviare abstracts in lingue diverse dall'inglese. 2) consentire la possibilità di Wiki open translation, 3) formare dei comitati di traduttori internazionali all'interno della redazione delle riviste scientifiche, e 4) creare versioni di riviste scientifiche scritte in lingua diversa dall'inglese. In linea con ciò, *Emerging Themes in Epidemiology* (*ndt.* *Temi Emergenti in Epidemiologia*) annuncia che – con effetto immediato - accetterà, in aggiunta alla versione in inglese, documenti contenenti la versione in lingua originale di abstracts o di articoli interi.
